# Supplementary material for: Analyzing the future climate change of Upper Blue Nile River Basin (UBNRB) using statistical down scaling techniques
Source: Copernicus journal article supplement (doi:10.5194/hess-2016-543), 2016-10-20
Supplement: Supplementary file [file hess-2016-543-AC1-supplement.pdf]

**Table 1 Statistics used for model selection for precipitation**

| MODEL    | R <sup>2</sup> |          | RMSE |          | BIAS |          | RR-RMSE |          | Score          |    |      |    |      |    |         |    | Sum |
|----------|----------------|----------|------|----------|------|----------|---------|----------|----------------|----|------|----|------|----|---------|----|-----|
|          | Glob           | Ethiopia | Glob | Ethiopia | Glob | Ethiopia | Glob    | Ethiopia | R <sup>2</sup> |    | RMSE |    | BIAS |    | RR-RMSE |    |     |
|          |                |          |      |          |      |          |         |          | G              | E  | G    | E  | G    | E  | G       | E  |     |
| MODBAR   | 0.91           | 0.96     | 0.87 | 0.75     | 0.18 | 0.53     | 0.85    | 0.54     | 1              | 1  | 1    | 1  |      |    | 1       | 1  | 6   |
| GFDLCM21 | 0.86           | 0.92     | 1.15 | 0.55     | 0.22 | 0.02     | 1.13    | 0.55     | 1              |    | 1    | 1  |      | 1  | 1       | 1  | 6   |
| GFDLCM20 | 0.87           | 0.96     | 1.10 | 0.88     | 0.09 | 0.25     | 1.10    | 0.85     | 1              | 1  | 1    |    | 1    | 1  | 1       |    | 6   |
| UKHADCM3 | 0.86           | 0.94     | 1.26 | 0.48     | 0.23 | 0.04     | 1.24    | 0.48     | 1              | 1  |      | 1  |      | 1  |         | 1  | 5   |
| MIROCMED | 0.83           | 0.97     | 1.16 | 1.37     | 0.04 | 1.16     | 1.16    | 0.72     |                | 1  | 1    | -1 | 1    | -1 | 1       |    | 2   |
| CCCMA-31 | 0.89           | 0.93     | 0.95 | 1.39     | 0.01 | 0.64     | 0.95    | 1.24     | 1              |    | 1    | -1 | 1    |    | 1       | -1 | 2   |
| MPIECH-5 | 0.81           | 0.94     | 1.35 | 0.58     | 0.25 | 0.30     | 1.33    | 0.49     |                | 1  | -1   | 1  |      |    | -1      | 1  | 1   |
| ECHO---G | 0.91           | 0.54     | 0.86 | 1.96     | 0.13 | 1.79     | 0.85    | 0.78     | 1              | -1 | 1    | -1 | 1    | -1 | 1       |    | 1   |
| MRI-232A | 0.89           | 0.84     | 0.97 | 2.47     | 0.08 | 1.26     | 0.96    | 2.12     | 1              |    | 1    | -1 | 1    | -1 | 1       | -1 | 1   |
| FGOALS1G | 0.82           | 0.68     | 1.23 | 0.78     | 0.31 | 0.39     | 1.19    | 0.67     |                | -1 |      | 1  | -1   |    |         | 1  | 0   |
| CCSM--30 | 0.80           | 0.32     | 1.33 | 0.92     | 0.16 | 0.26     | 1.32    | 0.88     |                | -1 |      |    |      | 1  |         |    | 0   |
| CSIRO-30 | 0.81           | 0.93     | 1.21 | 0.97     | 0.16 | 0.28     | 1.20    | 0.93     |                |    |      |    |      | 1  |         | -1 | 0   |
| IPSL_CM4 | 0.81           | 0.82     | 1.27 | 1.15     | 0.09 | 1.04     | 1.27    | 0.48     |                | -1 |      | -1 | 1    | -1 |         | 1  | -1  |
| MIROC-HI | 0.80           | 0.88     | 1.34 | 3.08     | 0.28 | 2.55     | 1.31    | 1.73     |                |    |      |    |      |    |         | -1 | -1  |
| NCARPCM1 | 0.67           | 0.79     | 1.72 | 0.54     | 0.34 | 0.07     | 1.68    | 0.54     | -1             | -1 | -1   | 1  | -1   | 1  | -1      | 1  | -2  |
| INMCM-30 | 0.70           | 0.64     | 1.61 | 0.77     | 0.12 | 0.36     | 1.60    | 0.68     | -1             | -1 | -1   | 1  | 1    |    | -1      |    | -2  |
| UKHADGEM | 0.80           | 0.92     | 1.61 | 0.93     | 0.39 | 0.02     | 1.57    | 0.93     | -1             |    | -1   |    | -1   | 1  | -1      | -1 | -4  |
| BCCRBCM2 | 0.79           | 0.95     | 1.31 | 1.57     | 0.31 | 1.15     | 1.28    | 1.06     | -1             | 1  |      | -1 | -1   | -1 |         | -1 | -4  |
| GISS--EH | 0.73           | 0.76     | 1.51 | 0.97     | 0.34 | 0.51     | 1.47    | 0.83     | -1             | -1 | -1   |    | -1   |    | -1      |    | -5  |
| CNRM-CM3 | 0.77           | 0.98     | 1.44 | 1.97     | 0.54 | 1.77     | 1.33    | 0.86     | -1             | 1  | -1   | -1 | -1   | -1 | -1      | -1 | -5  |
| GISS--ER | 0.77           | 0.85     | 1.43 | 1.14     | 0.30 | 0.65     | 1.40    | 0.94     | -1             |    | -1   |    | -1   | -1 | -1      | -1 | -6  |

**Table 2 Statistics used for model selection for temperature**

| MODEL    | CORREL |          | RMSE |          | BIAS  |          | CORR-RMSE |          | Score          |    |      |    |      |    |         |    | Sum |
|----------|--------|----------|------|----------|-------|----------|-----------|----------|----------------|----|------|----|------|----|---------|----|-----|
|          | Glob   | Ethiopia | Glob | Ethiopia | Glob  | Ethiopia | Glob      | Ethiopia | R <sup>2</sup> |    | RMSE |    | BIAS |    | RR-RMSE |    |     |
|          |        |          |      |          |       |          |           |          | G              | E  | G    | E  | G    | E  | G       | E  |     |
| MPIECH-5 | 1.00   | 0.96     | 1.47 | 1.25     | -0.26 | 0.26     | 1.45      | 1.25     | 1              | 1  | 1    | 1  | 1    | 1  | 1       | 1  | 8   |
| UKHADCM3 | 0.99   | 0.92     | 2.05 | 2.30     | -0.90 | 0.90     | 1.84      | 2.22     | 1              | 1  | 1    | 1  | 1    | 1  | 1       |    | 7   |
| MIROC-HI | 0.99   | 0.98     | 1.67 | 2.51     | -0.54 | 0.54     | 1.58      | 0.86     | 1              | 1  | 1    | 1  | 1    | -1 | 1       | 1  | 6   |
| CCSM--30 | 1.00   | 0.87     | 1.40 | 2.56     | -0.29 | 0.29     | 1.36      | 2.53     | 1              |    | 1    | 1  | 1    | 1  | 1       |    | 6   |
| MODBAR   | 1.00   | 0.93     | 1.75 | 2.81     | -1.24 | 1.24     | 1.23      | 2.16     | 1              | 1  | 1    | 1  |      |    | 1       |    | 5   |
| GFDLCM21 | 0.99   | 0.93     | 2.30 | 2.88     | -1.47 | 1.47     | 1.77      | 1.61     | 1              | 1  |      | 1  |      | -1 | 1       | 1  | 4   |
| MRI-232A | 1.00   | 0.79     | 1.89 | 2.90     | -0.81 | 0.81     | 1.71      | 2.80     | 1              | -1 | 1    |    | 1    | 1  | 1       | -1 | 3   |
| CNRM-CM3 | 0.99   | 0.91     | 2.68 | 4.97     | -1.76 | 1.76     | 2.03      | 2.11     |                |    |      |    |      |    |         | 1  | 1   |
| CSIRO-30 | 0.99   | 0.93     | 2.65 | 3.43     | -1.77 | 1.77     | 1.97      | 1.79     |                | 1  |      | -1 |      | -1 |         | 1  | 0   |

|          |      |      |      |      |       |      |      |      |    |    |    |    |    |    |    |    |    |
|----------|------|------|------|------|-------|------|------|------|----|----|----|----|----|----|----|----|----|
| GISS--EH | 0.98 | 0.85 | 2.71 | 2.66 | 0.62  | 0.62 | 2.64 | 2.66 | -1 |    |    | 1  | 1  | 1  | -1 | -1 | 0  |
| ECHO---G | 0.99 | 0.74 | 2.03 | 3.19 | 0.31  | 0.31 | 2.01 | 3.15 | -1 | -1 | 1  |    | 1  | 1  |    | -1 | 0  |
| UKHADGEM | 0.99 | 0.89 | 2.90 | 3.21 | -2.11 | 2.11 | 1.99 | 2.15 | 1  |    | -1 |    | -1 | -1 |    |    | -2 |
| MIROCMED | 0.99 | 0.82 | 2.20 | 3.35 | -1.06 | 1.06 | 1.93 | 2.89 |    | -1 |    |    |    |    |    | -1 | -2 |
| GFDLCM20 | 0.99 | 0.97 | 3.12 | 3.51 | -2.28 | 2.28 | 2.13 | 1.34 | -1 | 1  | -1 | -1 | -1 | -1 | -1 | 1  | -4 |
| BCCRBCM2 | 0.99 | 0.90 | 3.27 | 4.32 | -2.22 | 2.22 | 2.41 | 2.08 | -1 |    | -1 | -1 | -1 | -1 | -1 | 1  | -5 |
| CCCMA-31 | 0.99 | 0.84 | 3.01 | 3.45 | -1.81 | 1.81 | 2.41 | 2.53 |    | -1 | -1 | -1 | -1 |    | -1 |    | -5 |
| IPSL_CM4 | 0.99 | 0.80 | 2.78 | 3.43 | -1.79 | 1.79 | 2.13 | 3.43 | -1 | -1 | -1 | -1 | -1 | 1  | -1 | -1 | -6 |
| NCARPCM1 | 0.99 | 0.78 | 2.98 | 4.70 | -2.14 | 2.14 | 2.07 | 3.19 | -1 | -1 | -1 | -1 | -1 | -1 | -1 | -1 | -8 |
| INMCM-30 | 0.99 | 0.78 | 3.02 | 4.58 | -1.97 | 1.97 | 2.29 | 3.41 | -1 | -1 | -1 | -1 | -1 | -1 | -1 | -1 | -8 |

**Table 3** Average score value from precipitation and average

| Model    | Score         |             | Average | Rank |
|----------|---------------|-------------|---------|------|
|          | Precipitation | Temperature |         |      |
| UKHADCM3 | 7             | 5           | 6       | 1    |
| MODBAR   | 5             | 6           | 5.5     | 2    |
| GFDLCM21 | 4             | 6           | 5       | 3    |
| MPIECH-5 | 8             | 1           | 4.5     | 4    |
| CCSM--30 | 6             | 0           | 3       | 5    |
| MIROC-HI | 6             | -1          | 2.5     | 6    |
| MRI-232A | 3             | 1           | 2       | 7    |
| GFDLCM20 | -4            | 6           | 1       | 8    |
| ECHO---G | 0             | 1           | 0.5     | 9    |
| CSIRO-30 | 0             | 0           | 0       | 10   |
| MIROCMED | -2            | 2           | 0       | 11   |
| CCCMA-31 | -5            | 2           | -1.5    | 12   |
| CNRM-CM3 | 1             | -5          | -2      | 13   |
| GISS--EH | 0             | -5          | -2.5    | 14   |
| UKHADGEM | -2            | -4          | -3      | 15   |
| IPSL_CM4 | -6            | -1          | -3.5    | 16   |
| BCCRBCM2 | -5            | -4          | -4.5    | 17   |
| INMCM-30 | -8            | -2          | -5      | 18   |
| NCARPCM1 | -8            | -2          | -5      | 19   |
